# Supplementary material for: Synthesis of mesoporous titanium dioxide by soft template based approach: characterization and application in dye-sensitized solar cells
Source: Royal Society of Chemistry journal article supplement (doi:10.1039/b921360k), 2010-01-01
Supplement: b921360k.pdf [file b921360k.pdf]

## SUPPORTING INFORMATION

**Table S1** Photovoltaic performance of the DSSC devices\* made from various *meso*-TiO<sub>2</sub> powders at AM1.5 and irradiance of 100 mW/cm<sup>2</sup>

| Surfactant | SC/TIPR<br>(molar<br>ratio) | Sample<br>name | Amount<br>of<br>adsorbed<br>dye<br>×10 <sup>-7</sup><br>(mol.cm <sup>-2</sup> ) | J <sub>sc</sub><br>(mA.cm <sup>-2</sup> ) | V <sub>oc</sub><br>(mV) | FF (%)    | η (%)    |
|------------|-----------------------------|----------------|---------------------------------------------------------------------------------|-------------------------------------------|-------------------------|-----------|----------|
| OTAB       | 1/1                         | O1             | 5.7                                                                             | 11.95±0.1                                 | 680±2                   | 64.73±0.8 | 5.26±0.1 |
|            | 1/3                         | O3             | 6.3                                                                             | 12.35±0.2                                 | 688±3                   | 68.89±0.2 | 5.85±0.1 |
|            | 1/7                         | O7             | 7.3                                                                             | 13.33±0.2                                 | 721±3                   | 69.0±0.5  | 6.63±0.1 |
|            | 1/9                         | O9             | 7.5                                                                             | 13.29±0.2                                 | 724±2                   | 69.1±0.6  | 6.65±0.1 |
| DOTAB      | 1/1                         | D1             | 6.1                                                                             | 12.22±0.3                                 | 690±2                   | 65.01±0.6 | 5.58±0.1 |
|            | 1/3                         | D3             | 6.7                                                                             | 12.80±0.2                                 | 694±2                   | 68.85±0.3 | 6.12±0.2 |
|            | 1/7                         | D7             | 7.8                                                                             | 13.64±0.1                                 | 729±1                   | 71.14±0.4 | 7.07±0.1 |
|            | 1/9                         | D9             | 7.9                                                                             | 13.72±0.1                                 | 730±1                   | 71.10±0.5 | 7.12±0.1 |

\*The listed data are the average value of two independent measurements under same condition.

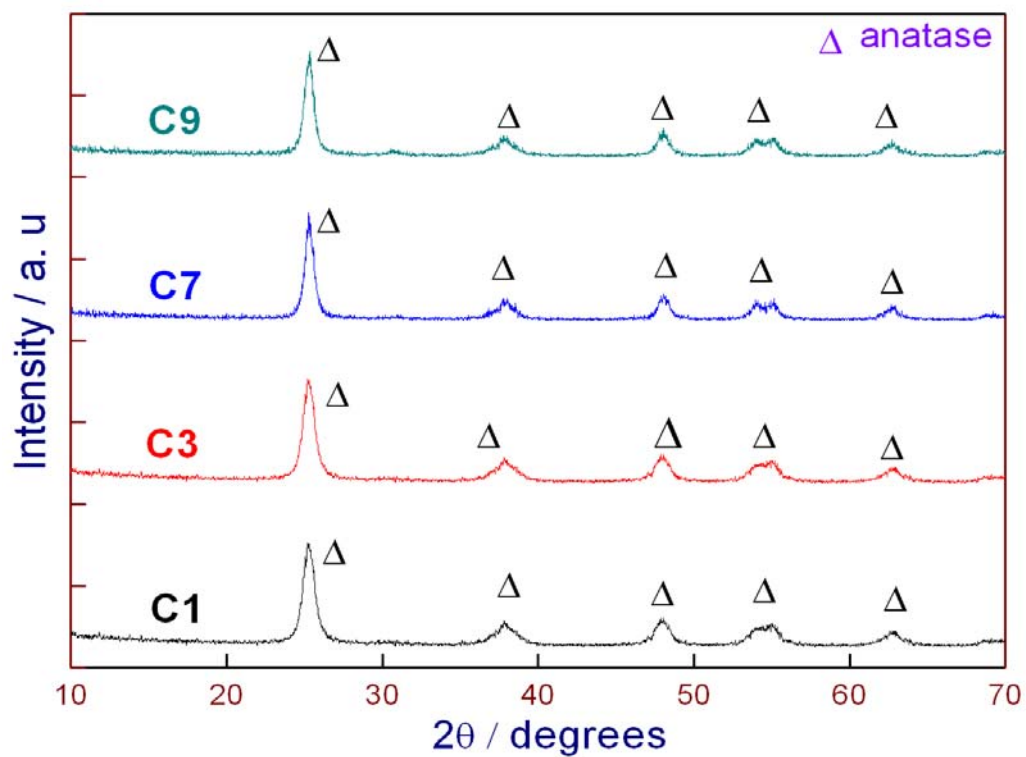

**Fig. S1** PXR D spectrum of various *meso*-TiO<sub>2</sub> samples synthesized using CTAB

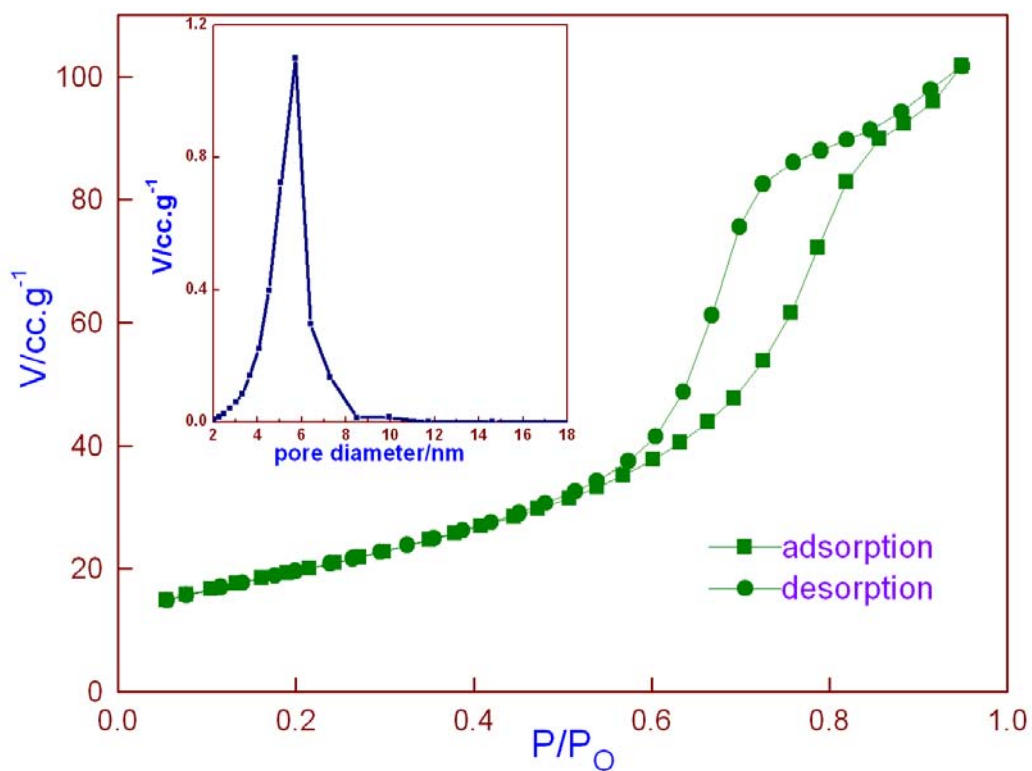

**Fig. S2**  $\text{N}_2$  adsorption and desorption isotherms of samples O5 with corresponding BJH pore size distribution as an inset

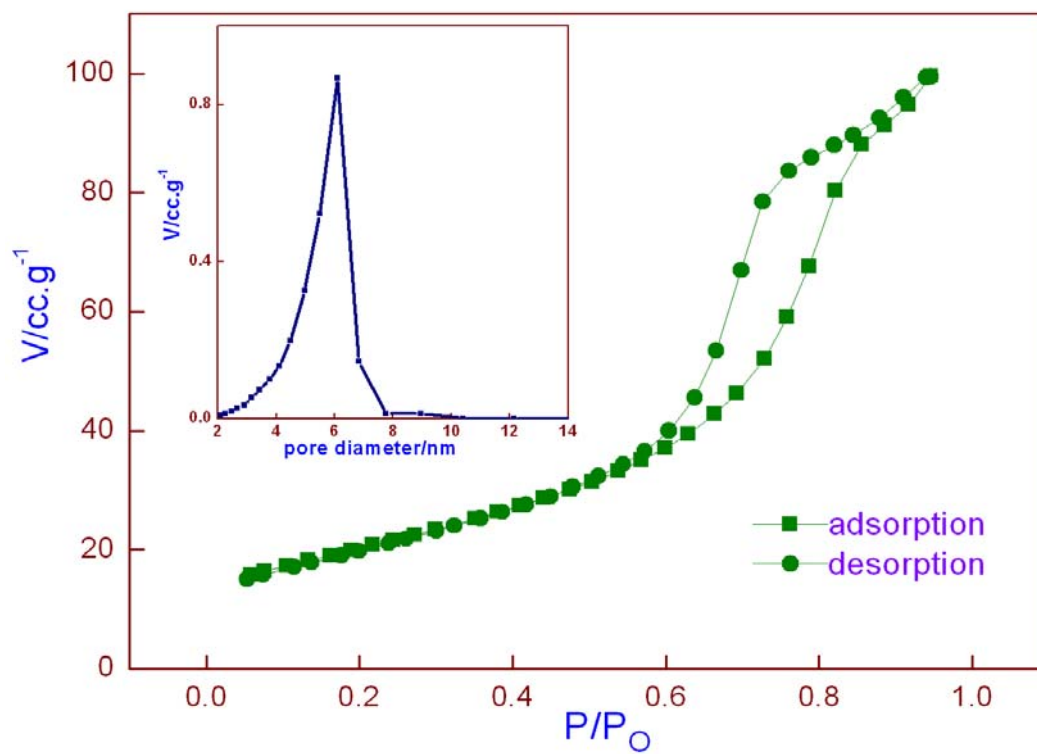

**Fig. S3**  $\text{N}_2$  adsorption and desorption isotherms of samples D5 with corresponding BJH pore size distribution as an inset

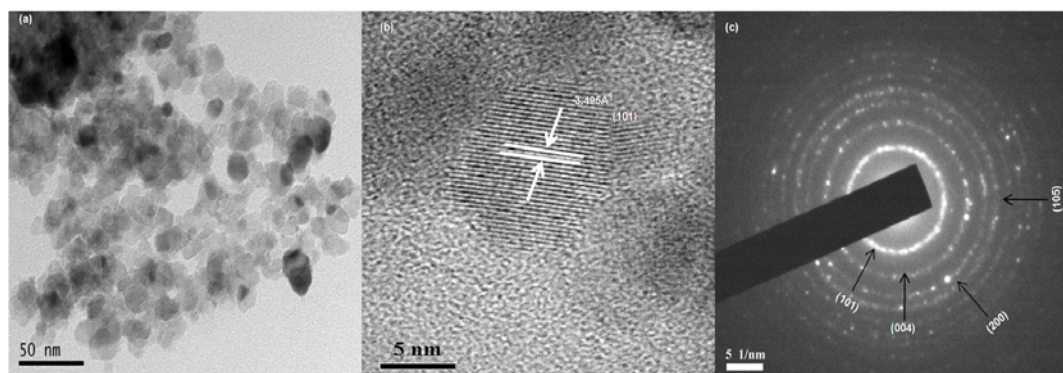

**Fig. S4** (a) TEM, (b) HRTEM and (c) SAED images of *meso*-TiO<sub>2</sub> (O5)

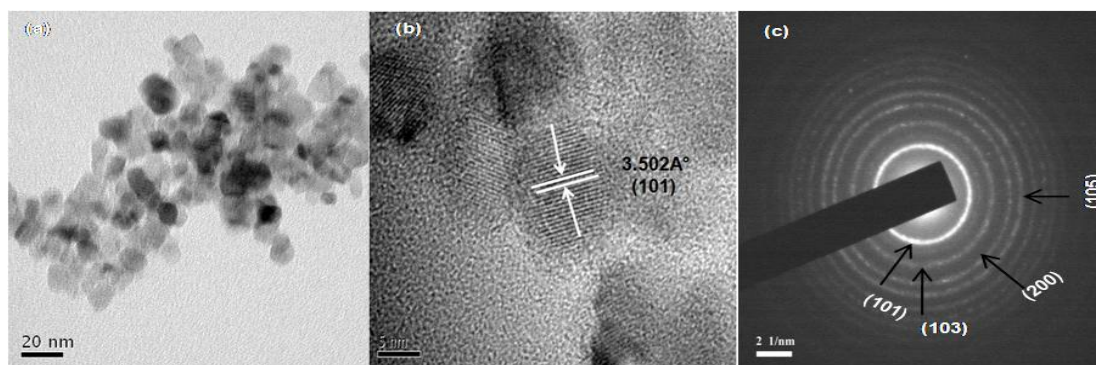

**Fig. S5** (a) TEM, (b) HRTEM and (c) SAED images of *meso*-TiO<sub>2</sub> (D5)
